# Supplementary material for: RNA: packaged and protected by VLPs
Source: PubMed Central journal article supplement (PMC9080931; doi:10.1039/c8ra02084a), 2018-06-12
Supplement: RA-008-C8RA02084A-s001.pdf [file RA-008-C8RA02084A-s001.pdf]

Supporting Information

## RNA: Packaged and Protected by VLPs

*Po-Yu Fang,<sup>a</sup> Jessica C. Bowman,<sup>a</sup> Lizzette M. Gómez Ramos,<sup>a,b</sup> Chiaolong Hsiao,<sup>c</sup> and Loren Dean Williams<sup>a,\*</sup>*

<sup>a</sup>School of Chemistry and Biochemistry, Georgia Institute of Technology, Atlanta, GA, 30332, USA, <sup>b</sup>School of Chemical and Biomolecular Engineering, Georgia Institute of Technology, Atlanta, GA 30332, USA, <sup>c</sup>Institute of Biochemical Sciences, National Taiwan University, Taipei 10617, Taiwan, R.O.C.

\* Address correspondence to Loren Dean Williams.

**Reagents.** DNA oligomers were obtained from Eurofins MWG Operon, Inc. All DNA constructs were confirmed by sequencing (Eurofins MWG Operon). NZY broth media was purchased from TEKNOVA. Sec-Butanol and Chloroform and Magnesium Chloride hexahydrate were purchased from Fisher Scientific. Ferrous Ammonium Sulfate Hexahydrate was obtained from EM Science. Ammonium sulfate was purchased from ICN Biomedicals. Sucrose, RNase- and DNase-free, was purchased from Amresco. Dithiothreitol (DTT) were purchased from Research Products International Corp. (+)-sodium L-ascorbate was purchased from Sigma-Aldrich. Sodium dodecyl sulfate was purchased from Shelton Scientific, Inc. Polyethylene glycol 8000 was purchased from J. T. Baker. 30% hydrogen peroxide was purchased from Fisher Scientific. BCA protein assay kit was purchased from Thermo Scientific. Low range ssRNA ladder was purchased from New England Biolabs. Ultra-Pure SequGel was purchased from National Diagnostics. Polyallomer centrifuge tubes were purchased from Beckman Coulter. Agilent RNA 6000 Nano Kit was purchased from Agilent Technologies. Amicon® Ultra centrifugal filters (100 kDa MWCO) were purchased from Millipore. Spectra/Por® dialysis tubing (15 KDa MWCO) was purchased from Spectrum® Laboratories, Inc. All other reagents were analytical grade.

Table S1. Primers and oligomers used for construction of the Q $\beta$  CP gene<sup>a</sup>

| <b>Oligomer name</b> | <b>DNA sequence<sup>b</sup></b>                        |
|----------------------|--------------------------------------------------------|
| CP-Fwd <sup>c</sup>  | 5'- GTG <u>GCC ATG GCA</u> AAT TAG AGA CTG TTA CTT -3' |
| CP-Rev <sup>d</sup>  | 5'- CAC <u>CCC TAG GTC</u> AAT ACG CTG GGT TC -3'      |

|         |                                                                                                           |
|---------|-----------------------------------------------------------------------------------------------------------|
| QβCP-F1 | 5'- GTG GGC TCA GCT CAA TAC GCT GGG TTC AGC TGA<br>TCA ATA GCA TCG ATC AGC AGA GGA CTA -3'                |
| QβCP-R1 | 5'- GCT TTT GTT CGT ACA GAG CTT GCT GCT CTG CTC<br>GCT AGT CCT CTG CTG ATC GAT GCT ATT -3'                |
| QβCP-F2 | 5'- GCA AGC TCT GTA CGA ACA AAA GCT CGT TCC TCA<br>TCG GTA CTA TAC TGC GTG AAC GAA AAG GTC -3'            |
| QβCP-R2 | 5'- TTG TGA CCC ATC CGT TAC TCG CCA GGC ATA TGC<br>TGA CGT GAC CTT TTC GTT CAC GCA GTA TAG TA -3'         |
| QβCP-F3 | 5'- CGA GTA ACG GAT GGG TCA CAA GAA CCG TTT<br>GCA GTG CAA GCG GTC GGG TTC TGG ATC TTA ACC<br>TGG ACC -3' |
| QβCP-R3 | 5'- CCG TTT CGG TAT CTC AGC CTT CTC GCA ATC GTA<br>AGA ACT ACA AGG TCC AGG TTA AGA TCC AGA ACC -<br>3'    |
| QβCP-F4 | 5'- AAG GCT GAG ATA CCG AAA CGG TAA CAC GCT<br>TCT CCA GCG CAG GAA CTG CAC CCG CTT GTG AAA<br>GCG-3'      |
| QβCP-R4 | 5'- TCT GGT CCT CAA TCC GCG TGG GGT AAA TCC CAC<br>TAA CGG CGT TGC CTC GCT TTC ACA AGC GGG TG -3'         |
| QβCP-F5 | 5'- ACG CGG ATT GAG GAC CAG AGT TTG TTT TCC ATC<br>TTT CCC GAT GTT ACC TAA AGT AAC AGT C -3'              |
| QβCP-R5 | 5'- CAC CCC ATG GGC AAA ATT AGA GAC TGT TAC TTT<br>AGG TAA CAT CGG GAA -3'                                |

a) Genes were constructed by recursive PCR (Bowman et al. 2012).

b) Restriction sites are underlined.

c) CP-Fwd is the forward primer, which contains an *Nco*I site.

d) CP-Rev is the reverse primer, which contains an *Avr*II site.

Table S2. Primers and oligomers used for non-viral RNA gene construction.

| <b>a-rRNA-hp<sup>a,b,c,d,e</sup></b> | <b>Primer or oligomer sequence</b>                                |
|--------------------------------------|-------------------------------------------------------------------|
| a-rRNA-hp FWD                        | 5'- GTG <u>GTC</u> TAG A <u>GT CCG AGT AAT TTA CGT TTT GA</u> -3' |
| a-rRNA-hp REV                        | 5'- GGT <u>GGC</u> TCA <u>GCG</u> CGA AGA TGC TGT -3'             |

|                    |                                                                                                               |
|--------------------|---------------------------------------------------------------------------------------------------------------|
| a-rRNA-hp oligo F1 | 5'- <u>TCT AGA</u> <i>GTC CGA GTA ATT TAC GTT TTG ATA CGG TTG CGG AAC TTG CGG</i> GGT GCC TAT TGA AGC ATG -3' |
| a-rRNA-hp oligo F2 | 5'- <u>TCT CTA TCC</u> <u>GCC ACG GGC</u> TTC CTC GTG CTT AGT AAC TAA GGA TGA AAT GCA TGT C -3'               |
| a-rRNA-hp oligo R2 | 5'- <u>GCT CAG</u> <u>CGC GAA GAT GCT GTC TTA GAC</u> ATG CAT TTC ATC CTT AGT TAC TAA GC -3'                  |

| <b>23S rRNA-hp hp<sup>a,b,c,d,e</sup></b> | <b>Primer or oligomer sequence</b>                                                                      |
|-------------------------------------------|---------------------------------------------------------------------------------------------------------|
| 23S rRNA-hp FWD                           | 5'- GTG <u>GTC TAG A</u> <i>GT CCG AGT AAT TTA CGT TTT GA</i> -3'                                       |
| 23S rRNA-hp REV                           | 5'- GGT <u>GGC TCA GCG</u> CGA AGA TGC TGT -3'                                                          |
| 23S rRNA-hp oligo F1                      | 5'- <u>TCT AGA</u> <i>GTC CGA GTA ATT TAC GTT TTG ATA CGG TTG CGG AAC TTG C</i> -3'                     |
| 23S rRNA-hp oligo R1                      | 5'- <u>GCA TCC ACC</u> <u>GTG GGC CCT TAC</u> <u>CAT CTT GAC</u> <i>GCA AGT TCC GC AAC CGT AT C</i> -3' |
| 23S rRNA-hp oligo F2                      | 5'- <u>CCG AGG TCT TGA CCC CTC</u> <u>CTT CCT CGT GCT TAG TAA CTA AGG ATG AAA TG</u> -3'                |
| 23S rRNA-hp oligo R2                      | 5'- <u>GCT CAG</u> <u>CGC GAA GAT GCT GTC TTA GAC</u> ATG CAT TTC ATC CTT AGT TAC TAA GCA CGA G -3'     |

| <b>mRNA<sub>GFP</sub>-hp<sup>d,e</sup></b> | <b>Primer or oligomer sequence</b>                                    |
|--------------------------------------------|-----------------------------------------------------------------------|
| mRNA <sub>GFP</sub> -hp FWD                | 5'- GTG <u>GTC TAG A</u> <u>AT GGC TAG CAA AGG AGA AGA ACT CT</u> -3' |
| mRNA <sub>GFP</sub> -hp REV                | 5'- GGT <u>GGC TCA GCG</u> CGA AGA TGC TGT -3'                        |

a) The Q $\beta$  hp is highlighted in blue.

---

| RBS-mRNA <sub>GFP</sub> - hp <sup>a,b,c</sup> | Primer or oligomer sequence                                                                                     |
|-----------------------------------------------|-----------------------------------------------------------------------------------------------------------------|
| RBS-mRNA <sub>GFP</sub> -hp FWD               | 5'- GTG GTC TAG A <u>AT</u> <u>GGC TAG CAA AGG AGA AGA</u><br><u>ACT CT</u> -3'                                 |
| RBS-mRNA <sub>GFP</sub> -hp REV               | 5'- GGT <u>GGC TCA GCG CGA</u> AGA TGC TGT -3'                                                                  |
| RBS-mRNA <sub>GFP</sub> -hp oligo F1          | 5'- TCT AGA ATA ATT TTG TTT AAC TTT AAG <u>AAG GAG</u><br>ATA TAC <u>CAT GGC TAG CAA AGG AGA AGA ACT CT</u> -3' |

---

| a-rRNA <sup>a,b,d</sup> | Primer or oligomer sequence                                |
|-------------------------|------------------------------------------------------------|
| a-rRNA FWD              | 5'- GTG GTC TAG A <u>GT CCG AGT AAT TTA CGT TTT GA</u> -3' |
| a-rRNA REV              | 5'- GGT <u>GGC TCA GCG CCC GTG GCG GAT AGA GA</u> -3'      |

---

b) The spacer region highlighted in pink *italics*.

c) The ribosomal binding site (RBS), highlighted in red.

d) Overlapping recombinant RNA fragments, including a-rRNA, 23S rRNA, and GFP mRNA are highlighted in yellow.

e) *Xba*I/*Bln*I sites underlined.

#### References:

Bowman JC, Azizi B, Lenz TK, Roy P, Williams LD. 2012. Preparation of long templates for RNA in vitro transcription by Recursive PCR. In *Recombinant and In Vitro RNA Synthesis: Methods and Protocols, Methods in Molecular Biology*, Vol 941 (ed. GL Conn), pp. 19-41. Springer Science, LLC.
